# Supplementary material
Source: Springer Nature journal article supplement (https://www.springermedizin.de/resource/supplementary/13023_2009_193_MOESM28_ESM.pdf/9641832)
Supplement: MOESM28 [file 9641832]

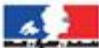

Ministère de la Santé  
et du Solidarité  
Direction Générale de la Santé

# Carte de soins et d'urgence

Emergency Healthcare Card

## Maladie de Fabry

*Fabry disease*

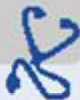

La maladie de Fabry est une maladie génétique héréditaire de surcharge (groupe des maladies lysosomales) caractérisée par une atteinte plus viscérale, plus ou moins cérébrale, cardiaque et rénale.

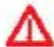

- Risque accru d'accident vasculaire cérébral, d'infarctus du myocarde, de troubles de la conduction et du rythme cardiaque et de complications aiguës liées à l'insuffisance rénale chronique.
- Risque d'accident allergique grave au cours du traitement substitutif par enzymothérapie.

Cette carte est remplie et mise à jour par le médecin, en présence et avec l'accord du malade qui en est le propriétaire.

Ce document est confidentiel et soumis au secret médical.

Nul ne peut en divulguer la communication sans autorisation du titulaire ou de son représentant légal.
